# Supplementary material for: Visible-light driven tetracycline hydrochloride degradation by nano-lanthanum hydroxide modified carbon nitride: performance, mechanism, and application in real wastewater treatment
Source: Royal Society of Chemistry journal article supplement (doi:10.1039/d3ew00233k), 2023-01-01
Supplement: d3ew00233k1.pdf [file d3ew00233k1.pdf]

**Visible-light driven Tetracycline hydrochloride degradation by  $\text{La}(\text{OH})_3$   
modified g- $\text{C}_3\text{N}_4$ : performance, mechanism, and application in real wastewater  
treatment**

Hanghang Xu<sup>1,2</sup>, Xuejie Yin<sup>2</sup>, Bei Yang<sup>2</sup>, Evangelos Petropoulos<sup>3,4</sup>, Lihong Xue<sup>2</sup>,  
Linzhang Yang<sup>2</sup>, Jian Xiong<sup>1\*</sup> and Shiyong He<sup>2\*</sup>

<sup>1</sup>College of Chemistry and Chemical Engineering, Henan University of Science and  
Technology, Luoyang, Henan Province, China

<sup>2</sup> Key Lab of Agro-Environment in Downstream of Yangtze Plain, Ministry of  
Agriculture, Institute of Agricultural Resources and Environment, Jiangsu Academy  
of Agricultural Sciences, Nanjing, Jiangsu Province, China

<sup>3</sup>School of Engineering, Newcastle University, Newcastle upon Tyne, NE1 7RU, UK

<sup>4</sup>Stantec, UK, Newcastle upon Tyne, NE1 3DY, UK

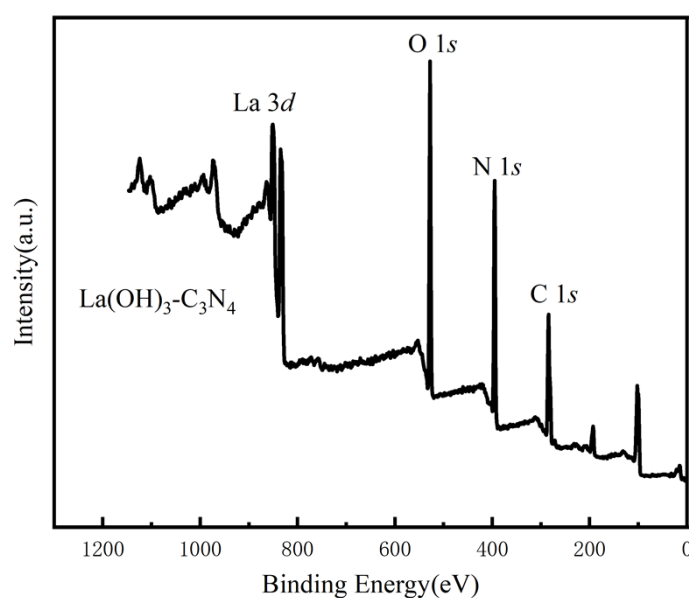

**Figure S1.** XPS spectra of  $\text{La}(\text{OH})_3/\text{g-C}_3\text{N}_4$

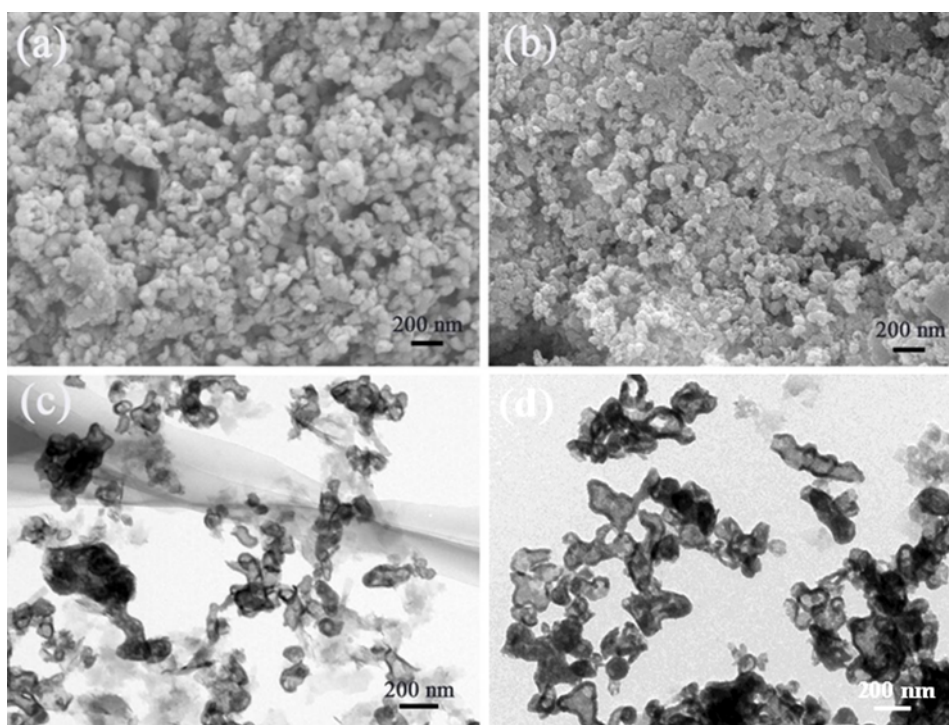

**Figure S2.** SEM and TEM images of La(OH)<sub>3</sub>/g-C<sub>3</sub>N<sub>4</sub> before (a and b) and after (c and d) TCH degradation

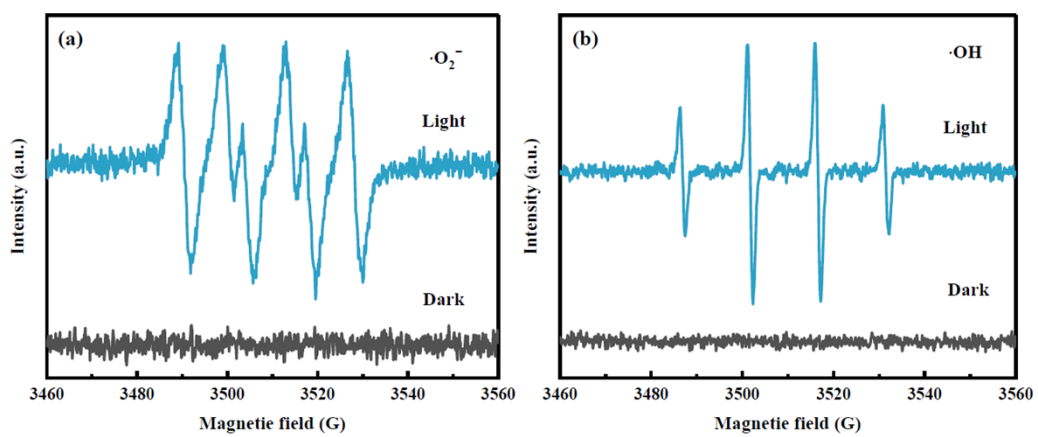

**Figure S3.** EPR spectra of La(OH)<sub>3</sub>/g-C<sub>3</sub>N<sub>4</sub> photocatalyst

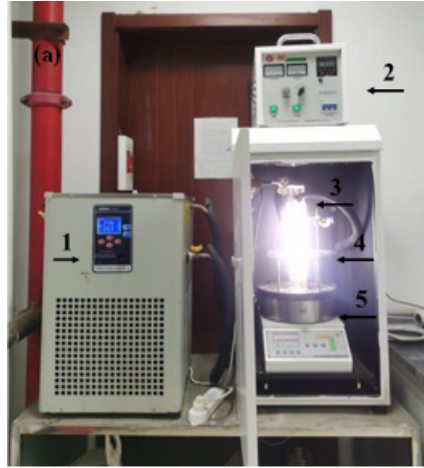

Figure S4. Image from the indoor trial simulation

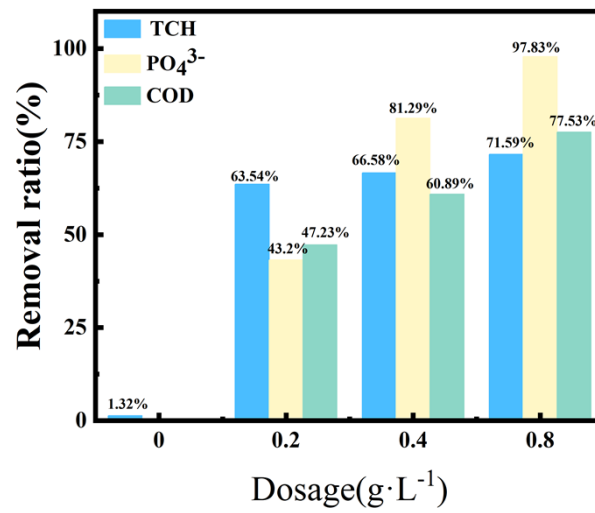

Figure S5. TCH, COD and PO<sub>4</sub><sup>3-</sup> removal efficiencies under indoor conditions

Table S1 First-order kinetic constants of different samples

| Samples                                            | k (h <sup>-1</sup> ) | R <sup>2</sup> |
|----------------------------------------------------|----------------------|----------------|
| Blank                                              | 0.0303               | 0.9919         |
| g-C <sub>3</sub> N <sub>4</sub>                    | 0.0657               | 0.9546         |
| La(OH) <sub>3</sub>                                | 0.0621               | 0.9703         |
| La(OH) <sub>3</sub> -C <sub>3</sub> N <sub>4</sub> | 0.2633               | 0.9945         |

**Table S2** First-order kinetic constants of different doses

| Doses (g·L <sup>-1</sup> ) | k (h <sup>-1</sup> ) | R <sup>2</sup> |
|----------------------------|----------------------|----------------|
| 0.2                        | 0.2202               | 0.9859         |
| 0.4                        | 0.2632               | 0.9920         |
| 0.8                        | 0.3892               | 0.9895         |

**Table S3** First-order kinetic constants of different concentrations

| Concentration<br>(mg·L <sup>-1</sup> ) | k (h <sup>-1</sup> ) | R <sup>2</sup> |
|----------------------------------------|----------------------|----------------|
| 20                                     | 0.3582               | 0.9963         |
| 40                                     | 0.2632               | 0.9920         |
| 100                                    | 0.1033               | 0.9911         |

**Table S4** First-order kinetic constants of different temperatures

| Temperature (°C) | k (h <sup>-1</sup> ) | R <sup>2</sup> |
|------------------|----------------------|----------------|
| 5                | 0.1437               | 0.9936         |
| 20               | 0.2632               | 0.9989         |
| 30               | 0.2376               | 0.9911         |

**Table S5** Radical scavenger information sheet

| Number | Active substance             | Radical scavenger | Concentration (mmol·L <sup>-1</sup> ) |
|--------|------------------------------|-------------------|---------------------------------------|
| 1      | ·OH                          | TPA               | 1                                     |
| 2      | ·O <sub>2</sub> <sup>-</sup> | BQ                | 1                                     |
| 3      | h <sup>+</sup>               | EDTA-2Na          | 1                                     |

**Table S6** Initial concentrations of TCH, PO<sub>4</sub><sup>3-</sup>, COD in actual wastewater

|                      | TCH | PO <sub>4</sub> <sup>3-</sup> | COD |
|----------------------|-----|-------------------------------|-----|
| Concentration (mg/L) | 175 | 288.45                        | 750 |

**Table S7** Weather information

| Address | Temperature (°C) | Time (h)           | UV index |
|---------|------------------|--------------------|----------|
| Nanjing | 28               | PM 12:00-<br>14:00 | 7        |
